# Supplementary material
Source: publisher figshare collection journal article supplement (https://karger.figshare.com/ndownloader/files/37511371)
Supplement: Supplementary file 1 [file 37511371]

*Table S1. Fit statistics for different time-homogeneous Latent Markov Models.*

| Model | LL | BIC | AIC | AIC3 | NPar | Sample size per state or class |
| --- | --- | --- | --- | --- | --- | --- |
| Step a: identification of latent states | | | | | | Percentage of total sample size |
| 1 state, 1 class | -6808.26 | 13634.12 | 13620.51 | 13622.51 | 2 | 100.0 |
| 2 state, 1 class | -5586.84 | 11235.30 | 11187.68 | 11194.68 | 7 | 91.3/8.7 |
| 3 state, 1 class | -5492.45 | 11108.12 | 11012.89 | 11026.89 | 14 | 92.1/4.8/3.1 |
| 4 state, 1 class | -5465.58 | 11133.60 | 10977.16 | 11000.16 | 23 | 90.9/5.0/3.2/1.0 |
| 5 state, 1 class | -5454.22 | 11207.70 | 10976.43 | 11010.43 | 34 | 91.2/5.0/1.8/1.2/0.8 |
|  |  |  |  |  |  |  |
| Step b: identification of latent classes | | | |  |  |  |
| 3 state, 2 class | -5474.03 | 11150.49 | 10994.05 | 11017.05 | 23 | Classes: 94.8/5.2  States: 92.6/5.2/2.2 |
| 4 state, 2 class | -5449.01 | 11241.29 | 10976.02 | 11015.02 | 39 | Classes: 94.9/5.1  States: 92.4/5.3/1.2/1.1 |
| 3 state,  mover-stayer | -5481.11 | 11111.86 | 10996.23 | 11013.23 | 17 | Classes: 89.2/10.8  States: 92.9/4.6/2.6 |
| **4 state,**  **mover-stayer** | **-5460.19** | **11158.02** | **10974.38** | **11001.38** | **27** | **Classes: 87.0/13.0**  **States: 91.2/5.0/2.8/1.0** |

*Note*. LL = Log likelihood; BIC = Bayesian information criterion; AIC = Akaike information criterion; AIC3: Corrected AIC with a penalty factor of 3; NPar = Number of parameters. In bold = best fitting model overall.
